# Supplementary material for: Whole-organism behavioral profiling reveals a role for dopamine in state-dependent motor program coupling in C. elegans
Source: eLife. 2020 Jun 8;9:e57093. doi: 10.7554/eLife.57093 (PMC7347390; doi:10.7554/eLife.57093)
Supplement: Supplementary file 1. — This excel sheet includes a detailed description of each statistical test carried out in this study. [file elife-57093-supp1.xlsx]

## Sheet: Figure 2
Figure 2D
Transition rates between postures
Intra-Group transition rates (n=8 posture groups) vs. Inter-group transition rates (n=8)
Wilcoxon Matched Pairs Signed Rank Test
p=0.0078
Figure 2E
N2 (n=30) velocity
Differences across the 9 states
Friedman test for differences among the 9 states	p<0.0001
N2 (n=30) angular speed
Differences across the 9 states
Friedman test for differences among the 9 states	p<0.0001
N2(n=30) fwd/pause/rev
Differences among the 9 states
2-factor ANOVA, examine effect of state	p<0.0001
N2 (n=30) defecation rate
Differences across the 9 states
Friedman test for differences among the 9 states	p<0.0001
N2 (n=30) egg-laying rate
Differences across the 9 states
Friedman test for differences among the 9 states	p<0.0001
N2 (n=30) average motion
Differences across the 9 states
Friedman test for differences among the 9 states	p<0.0001
N2 (n=30) short reversal rate
Differences across the 9 states
Friedman test for differences among the 9 states	p<0.0001
N2 (n=30) long reversal rate
Differences across the 9 states
Friedman test for differences among the 9 states	p<0.0001
Figure 2F
Examine effect of behavioral state on egg-laying frequency, holding velocity constant
For roaming and dwelling, egg-laying frequencies were determined for datapoints in different velocity bins
Minimum number of data points per velocity bin: 4 min data per animal
There were 8 velocity bins with a sufficient number of data points for both roaming and dwelling
For each of these eight bins, examine if egg-laying frequency is significantly different in roaming vs dwelling
Permutation test
Permutation test on roaming vs dwelling egg-laying frequencies for each velocity bin
significance level set to p<0.05 (after Bonferroni correction for 8 comparisons)
all 8 comparisons (i.e. 8 bins) reach significance
Examine effect of speed on egg-laying frequency, holding behavioral state constant
For Roaming and for dwelling, separately obtain correlation between velocity and egg-laying in each animal
n=30 animals
Boostrap to obtain confidence interval and examine whether distribution is significantly greater than 0
during roam	p=0.022
during dwell	p<0.001

## Sheet: Figure 3
Figure 3A
Average time per state (%)
Mann-Whitney U-test	Roam	N2 (n=30) vs.	cat-2(n4547) (n=10)	pdfr-1 (n=12)	tbh-1 (n=12)	tdc-1 (n=13)	tph-1 (n=13)
Bonferroni correction				0.0114905		0.00153308
Mann-Whitney U-test	Dwell1	N2 (n=30) vs.	cat-2(n4547) (n=10)	pdfr-1 (n=12)	tbh-1 (n=12)	tdc-1 (n=13)	tph-1 (n=13)
Bonferroni correction							7.21e-05
Mann-Whitney U-test	Dwell2	N2 (n=30) vs.	cat-2(n4547) (n=10)	pdfr-1 (n=12)	tbh-1 (n=12)	tdc-1 (n=13)	tph-1 (n=13)
Bonferroni correction						0.0146502	0.00169704
Mann-Whitney U-test	Dwell3	N2 (n=30) vs.	cat-2(n4547) (n=10)	pdfr-1 (n=12)	tbh-1 (n=12)	tdc-1 (n=13)	tph-1 (n=13)
Bonferroni correction				0.0138103		0.0425162	0.00307925
Mann-Whitney U-test	Dwell4	N2 (n=30) vs.	cat-2(n4547) (n=10)	pdfr-1 (n=12)	tbh-1 (n=12)	tdc-1 (n=13)	tph-1 (n=13)
Bonferroni correction						3.26e-05	4.18e-05
Mann-Whitney U-test	Dwell5	N2 (n=30) vs.	cat-2(n4547) (n=10)	pdfr-1 (n=12)	tbh-1 (n=12)	tdc-1 (n=13)	tph-1 (n=13)
Bonferroni correction
Mann-Whitney U-test	Dwell6	N2 (n=30) vs.	cat-2(n4547) (n=10)	pdfr-1 (n=12)	tbh-1 (n=12)	tdc-1 (n=13)	tph-1 (n=13)
Bonferroni correction						0.000325677	0.0409023
Mann-Whitney U-test	Dwell7	N2 (n=30) vs.	cat-2(n4547) (n=10)	pdfr-1 (n=12)	tbh-1 (n=12)	tdc-1 (n=13)	tph-1 (n=13)
Bonferroni correction			0.00247913				0.000219482
Mann-Whitney U-test	Dwell8	N2 (n=30) vs.	cat-2(n4547) (n=10)	pdfr-1 (n=12)	tbh-1 (n=12)	tdc-1 (n=13)	tph-1 (n=13)
Bonferroni correction				0.0235587
Velocity per state
Mann-Whitney U-test	Roam	N2 (n=30) vs.	cat-2(n4547) (n=10)	pdfr-1 (n=12)	tbh-1 (n=12)	tdc-1 (n=13)	tph-1 (n=13)
Bonferroni correction			0.00121236	0.000457971	0.0215974		0.0363631
Mann-Whitney U-test	Dwell1	N2 (n=30) vs.	cat-2(n4547) (n=10)	pdfr-1 (n=12)	tbh-1 (n=12)	tdc-1 (n=13)	tph-1 (n=13)
Bonferroni correction				0.0126017
Mann-Whitney U-test	Dwell2	N2 (n=30) vs.	cat-2(n4547) (n=10)	pdfr-1 (n=12)	tbh-1 (n=12)	tdc-1 (n=13)	tph-1 (n=13)
Bonferroni correction							0.0242888
Mann-Whitney U-test	Dwell3	N2 (n=30) vs.	cat-2(n4547) (n=10)	pdfr-1 (n=12)	tbh-1 (n=12)	tdc-1 (n=13)	tph-1 (n=13)
Bonferroni correction
Mann-Whitney U-test	Dwell4	N2 (n=30) vs.	cat-2(n4547) (n=10)	pdfr-1 (n=12)	tbh-1 (n=12)	tdc-1 (n=13)	tph-1 (n=13)
Bonferroni correction			0.00196199				1.03e-05
Mann-Whitney U-test	Dwell5	N2 (n=30) vs.	cat-2(n4547) (n=10)	pdfr-1 (n=12)	tbh-1 (n=12)	tdc-1 (n=13)	tph-1 (n=13)
Bonferroni correction						0.0189187
Mann-Whitney U-test	Dwell6	N2 (n=30) vs.	cat-2(n4547) (n=10)	pdfr-1 (n=12)	tbh-1 (n=12)	tdc-1 (n=13)	tph-1 (n=13)
Bonferroni correction
Mann-Whitney U-test	Dwell7	N2 (n=30) vs.	cat-2(n4547) (n=10)	pdfr-1 (n=12)	tbh-1 (n=12)	tdc-1 (n=13)	tph-1 (n=13)
Bonferroni correction			0.0128849			0.0146502	0.0112787
Mann-Whitney U-test	Dwell8	N2 (n=30) vs.	cat-2(n4547) (n=10)	pdfr-1 (n=12)	tbh-1 (n=12)	tdc-1 (n=13)	tph-1 (n=13)
Bonferroni correction						0.00169704
Angular speed per state
Mann-Whitney U-test	Roam	N2 (n=30) vs.	cat-2(n4547) (n=10)	pdfr-1 (n=12)	tbh-1 (n=12)	tdc-1 (n=13)	tph-1 (n=13)
Bonferroni correction				0.00324003	0.00867334
Mann-Whitney U-test	Dwell1	N2 (n=30) vs.	cat-2(n4547) (n=10)	pdfr-1 (n=12)	tbh-1 (n=12)	tdc-1 (n=13)	tph-1 (n=13)
Bonferroni correction			0.0415342			0.0134359
Mann-Whitney U-test	Dwell2	N2 (n=30) vs.	cat-2(n4547) (n=10)	pdfr-1 (n=12)	tbh-1 (n=12)	tdc-1 (n=13)	tph-1 (n=13)
Bonferroni correction			0.000738151			0.00788594
Mann-Whitney U-test	Dwell3	N2 (n=30) vs.	cat-2(n4547) (n=10)	pdfr-1 (n=12)	tbh-1 (n=12)	tdc-1 (n=13)	tph-1 (n=13)
Bonferroni correction			0.0498501			0.00124866
Mann-Whitney U-test	Dwell4	N2 (n=30) vs.	cat-2(n4547) (n=10)	pdfr-1 (n=12)	tbh-1 (n=12)	tdc-1 (n=13)	tph-1 (n=13)
Bonferroni correction			0.000174712				0.000385
Mann-Whitney U-test	Dwell5	N2 (n=30) vs.	cat-2(n4547) (n=10)	pdfr-1 (n=12)	tbh-1 (n=12)	tdc-1 (n=13)	tph-1 (n=13)
Bonferroni correction			0.000572782			6.96e-06
Mann-Whitney U-test	Dwell6	N2 (n=30) vs.	cat-2(n4547) (n=10)	pdfr-1 (n=12)	tbh-1 (n=12)	tdc-1 (n=13)	tph-1 (n=13)
Bonferroni correction			0.000836795			0.00188
Mann-Whitney U-test	Dwell7	N2 (n=30) vs.	cat-2(n4547) (n=10)	pdfr-1 (n=12)	tbh-1 (n=12)	tdc-1 (n=13)	tph-1 (n=13)
Bonferroni correction			0.00350778
Mann-Whitney U-test	Dwell8	N2 (n=30) vs.	cat-2(n4547) (n=10)	pdfr-1 (n=12)	tbh-1 (n=12)	tdc-1 (n=13)	tph-1 (n=13)
Bonferroni correction			0.000261727			0.00339288
Egg-laying rate per state
Mann-Whitney U-test	Roam	N2 (n=30) vs.	cat-2(n4547) (n=10)	pdfr-1 (n=12)	tbh-1 (n=12)	tdc-1 (n=13)	tph-1 (n=13)
Bonferroni correction			0.00107241
Mann-Whitney U-test	Dwell1	N2 (n=30) vs.	cat-2(n4547) (n=10)	pdfr-1 (n=12)	tbh-1 (n=12)	tdc-1 (n=13)	tph-1 (n=13)
Bonferroni correction
Mann-Whitney U-test	Dwell2	N2 (n=30) vs.	cat-2(n4547) (n=10)	pdfr-1 (n=12)	tbh-1 (n=12)	tdc-1 (n=13)	tph-1 (n=13)
Bonferroni correction				0.00846484
Mann-Whitney U-test	Dwell3	N2 (n=30) vs.	cat-2(n4547) (n=10)	pdfr-1 (n=12)	tbh-1 (n=12)	tdc-1 (n=13)	tph-1 (n=13)
Bonferroni correction
Mann-Whitney U-test	Dwell4	N2 (n=30) vs.	cat-2(n4547) (n=10)	pdfr-1 (n=12)	tbh-1 (n=12)	tdc-1 (n=13)	tph-1 (n=13)
Bonferroni correction				0.0343278
Mann-Whitney U-test	Dwell5	N2 (n=30) vs.	cat-2(n4547) (n=10)	pdfr-1 (n=12)	tbh-1 (n=12)	tdc-1 (n=13)	tph-1 (n=13)
Bonferroni correction
Mann-Whitney U-test	Dwell6	N2 (n=30) vs.	cat-2(n4547) (n=10)	pdfr-1 (n=12)	tbh-1 (n=12)	tdc-1 (n=13)	tph-1 (n=13)
Bonferroni correction
Mann-Whitney U-test	Dwell7	N2 (n=30) vs.	cat-2(n4547) (n=10)	pdfr-1 (n=12)	tbh-1 (n=12)	tdc-1 (n=13)	tph-1 (n=13)
Bonferroni correction
Mann-Whitney U-test	Dwell8	N2 (n=30) vs.	cat-2(n4547) (n=10)	pdfr-1 (n=12)	tbh-1 (n=12)	tdc-1 (n=13)	tph-1 (n=13)
Bonferroni correction
Defecation rate per state
Mann-Whitney U-test	Roam	N2 (n=30) vs.	cat-2(n4547) (n=10)	pdfr-1 (n=12)	tbh-1 (n=12)	tdc-1 (n=13)	tph-1 (n=13)
Bonferroni correction
Mann-Whitney U-test	Dwell1	N2 (n=30) vs.	cat-2(n4547) (n=10)	pdfr-1 (n=12)	tbh-1 (n=12)	tdc-1 (n=13)	tph-1 (n=13)
Bonferroni correction				0.00953273			0.0174
Mann-Whitney U-test	Dwell2	N2 (n=30) vs.	cat-2(n4547) (n=10)	pdfr-1 (n=12)	tbh-1 (n=12)	tdc-1 (n=13)	tph-1 (n=13)
Bonferroni correction
Mann-Whitney U-test	Dwell3	N2 (n=30) vs.	cat-2(n4547) (n=10)	pdfr-1 (n=12)	tbh-1 (n=12)	tdc-1 (n=13)	tph-1 (n=13)
Bonferroni correction				0.0279919			0.00339129
Mann-Whitney U-test	Dwell4	N2 (n=30) vs.	cat-2(n4547) (n=10)	pdfr-1 (n=12)	tbh-1 (n=12)	tdc-1 (n=13)	tph-1 (n=13)
Bonferroni correction							0.00546
Mann-Whitney U-test	Dwell5	N2 (n=30) vs.	cat-2(n4547) (n=10)	pdfr-1 (n=12)	tbh-1 (n=12)	tdc-1 (n=13)	tph-1 (n=13)
Bonferroni correction			0.00439718
Mann-Whitney U-test	Dwell6	N2 (n=30) vs.	cat-2(n4547) (n=10)	pdfr-1 (n=12)	tbh-1 (n=12)	tdc-1 (n=13)	tph-1 (n=13)
Bonferroni correction
Mann-Whitney U-test	Dwell7	N2 (n=30) vs.	cat-2(n4547) (n=10)	pdfr-1 (n=12)	tbh-1 (n=12)	tdc-1 (n=13)	tph-1 (n=13)
Bonferroni correction
Mann-Whitney U-test	Dwell8	N2 (n=30) vs.	cat-2(n4547) (n=10)	pdfr-1 (n=12)	tbh-1 (n=12)	tdc-1 (n=13)	tph-1 (n=13)
Bonferroni correction
Figure 3B
Overall pharyngeal pumping rate		N2 (n=30) vs.	tph-1 (n=13)
Mann-Whitney U-test			1.34e-05
Bonferroni correction
Figure 3C
Overall egg-laying rate	N2 (n=30) vs.	cat-2(n4547) (n=10)	cat-2(e1112) (n=11)
Mann-Whitney U-test		0.00447	0.48
Figure 3D
Roaming egg-laying rate	N2 (n=30) vs.	cat-2(n4547) (n=10)	cat-2(e1112) (n=11)
Mann-Whitney U-test		0.000214	0.0165
Dwelling egg-laying rate	N2 (n=30) vs.	cat-2(n4547) (n=10)	cat-2(e1112) (n=11)
Mann-Whitney U-test		0.373364	0.115
Figure 3E
Roaming egg-laying rate	N2 (n=30) vs.	dop-1 (n=12)	dop-2 (n=11)	dop-3 (n=14)	dop-2;dop-3 (n=19)	dop-4 (n=15)	dop-5 (n=19)	dop-6 (n=9)	lgc-53 (n=11)
Mann-Whitney U-test					0.000165151
Bonferroni correction
Dwelling egg-laying rate	N2 (n=30) vs.	dop-1 (n=12)	dop-2 (n=11)	dop-3 (n=14)	dop-2;dop-3 (n=19)	dop-4 (n=15)	dop-5 (n=19)	dop-6 (n=9)	lgc-53 (n=11)
Mann-Whitney U-test		0.00115536
Bonferroni correction

## Sheet: Figure 4
Figure 4A
Average distance to nearest eggs for k nearest eggs	N2(n=30)	Roaming vs.	Dwelling
Wilcoxon signed rank test		k=1	0.0872967
Bonferroni corrected		k=2	0.117481
		k=3	0.0196458
		k=4	0.00358884
		k=5	0.00174228
		k=6	0.00125057
		k=7	0.003065
		k=8	0.00331726
		k=9	0.003065
		k=10	0.00663921
Figure 4C
Percent of explored regions with eggs
	Roaming vs.	Dwelling
Wilcoxon signed rank test	N2 (n=30)	2.6138e-05
	Overall N2 (n=30) vs.	cat-2(n4547) (n=10)	dop-2;dop-3 (n=19)
Mann-Whitney U-test		0.0148153	4.78238e-06
	Roaming N2 (n=30) vs.	cat-2(n4547) (n=10)	dop-2;dop-3 (n=19)
Mann-Whitney U-test		0.00908577	1.02446e-05

## Sheet: Figure 5
Figure 5A
Egg-laying rate	dat-1::GtACR2 (n=12)	laser on vs.	laser off
Wilcoxon signed rank test			0.000488281
Figure 5B
Egg-laying rate		N2 (n=22) vs. dat-1::GtACR2 (n=12)	Overall	Roaming
Mann-Whitney U-test		(On Food)	0.00649952	0.0156766
Figure 5C
Egg-laying rate	dat-1::CoChR (n=35)	laser on vs.	laser off
Wilcoxon signed rank test	(On food)		0.000657144
Figure 5D
Egg-laying rate		N2 (n=22) vs. dat-1::CoChR (n=35)	Dwelling
Mann-Whitney U-test		(On Food)	0.00371468
Figure 5E
Egg-laying rate	dat-1::CoChR (n=44)	laser on vs.	laser off
Wilcoxon signed rank test	(Off Food)		3.45849e-05
Figure 5F
Egg-laying rate		N2 (n=38) vs. dat-1::CoChR (n=44)	Overall
Mann-Whitney U-test		(Off Food)	0.00148103

## Sheet: Figure 6
Figure 6A
Empirical bootstrap test to determine if corr(PDEcalcium,Speed) is significantly greater than 0
n=39 animals
bootstrap to determine confidence intervals and examine if correlation is significantly different from 0
p<0.0001
Figure 6C
Examine correlation of PDE calcium to each body angle
14 body angles examined
n=39 animals
Bootstrap to obtain confidence intervals and examine whether correlations are signficantly different from 0
p<0.05 for indicated body segments (after Bonferroni adjustment for 14 comparisons)
Figure 6E
Mann Whitney U-test to determine if PDE activity at peak phase (1.5-2.5 radians) is signifcantly greater than at all other phases
n=39 animals
p<0.001
Figure 6F
Rayleight test for non-uniformity of phases at which Wild Type animals lay eggs during roaming
n=827 egg events during roaming
p<0.0001
Figure 6G
Fisher's Exact Test to examine whether cat-2 mutants have different egg distribution across phases
WT (n=827); cat-2 (n=140)
p=0.0303

## Sheet: Figure 7
Figure 7A
Egg-laying ratio (lights on/off)		N2 (n=22) vs.	dat-1::CoChR (n=44)
Mann-Whitney U-test			0.0134092
Egg-laying ratio (lights on/off)		dat-1::CoChR (n=44) vs.	dat-1::CoChR; egl-1 (n=14)	dat-1::CoChR; lin-39 (n=13)	dat-1::CoChR; acr-2 (n=9)	dat-1::CoChR; unc-25 (n=15)	dat-1::CoChR; unc-30 (n=12)
Mann-Whitney U-test						0.0123326	0.0180675
Bonferroni correction
Figure 7B
2-way ANOVA (genotype, day of egg-laying); examine effect of genotype; post-hoc vs N2
ANOVA, effect of genotype	p=0.0027
n2	n=10	7 days data per animal		(vs. N2)
CX13881	n=10	7 days data per animal		p=0.0022
CX14453	n=5	7 days data per animal		p=0.0228
Figure 7C
Roaming Egg-laying proportion		N2 (n=30) vs.	unc-25(e156) (n=11)	unc-25(n2324) (n=12)
Mann-Whitney U-test			0.0164805	0.0216193
Dwelling Egg-laying proportion		N2 (n=30) vs.	unc-25(e156) (n=11)	unc-25(n2324) (n=12)
Mann-Whitney U-test			0.000312754	6.45932e-05
Figure 7D
Examine effect of genotype on egg-laying on/off food
One-way ANOVA with post-hoc test vs N2
ANOVA, effect of genotype	p<0.001
N2	6 plates	count eggs on plate; 10 animals per plate	(vs. N2)
CX13881	6 plates	count eggs on plate; 10 animals per plate	p=0.0014
CX14453	5 plates	count eggs on plate; 10 animals per plate	p=0.0939

## Sheet: Figure 1 - FS1
Figure 1 - figure supplement 1O
Examine Correlation between manually-scored and computer-scored pharyngeal pumping
n=35 videos (20sec each)
Pearson correlation on manual-score vs computer-score
r=0.9834; p<0.0001

## Sheet: Figure 2 - FS3
Figure 2 - figure supplement 3A
Body Angles compared across the 9 HMM states
	n (every 4000th body posture; determined to be independent based on posture autocorrelation)
roam	851
dwell1	98
dwell2	370
dwell3	348
dwell4	430
dwell5	226
dwell6	364
dwell7	218
dwell8	338
Permutation test
Compare average body angle in each state to average body angle in every other state (36 comparisons between states; 14 body angles; 504 comparisons total)
Permutation test to determine whether any two sets of body angles are significantly different
Significantly different postures were defined as having at least one body angle where p<0.05 (after Bonferroni adjustment for multiple comparisons)

## Sheet: Figure 2 - FS5
Figure 2 - figure supplement 5B
Examine if sum of squares of error (model vs real) is different for 8st HMM versus continuous models
Permutation Test
Permutation test to examine if the difference between sum(squares of error) for two different models is significant
n = an average of 2174 observations for each measurement (duration between a given set of postures) in each model
	p-value
8st HMM vs continuous-similarity model	p<0.001
8st HMM vs. continuous-pairwise-transition model	p<0.001

## Sheet: Figure 2 - FS7
Examine whether behaviors are significantly altered at HMM state transitions
n (# of observations) for each type of state transition was different (range: 260-3564)
40 types of state transitions were examined (those with >250 observations available)
3 behaviors measured at each transition (pumping, DMP, velocity)
Behavior at each state transition was described by 4 data points (2 bins of data prior to state transition; 2 bins of data after state transition)
Real observations were compared to 100,000 bootstrap samples (w/ same # data points, during same states, sampled from same animals -- just not at moments of transition)
p-value for significance was 0.01, after Bonferroni correction for 480 comparisons (3 behaviors, 4 data bins, 40 state transitions)

[truncated: 4 more sheets: Figure 3 - FS1, Figure 3 - FS2, Figure 4 - FS1, Figure 6 - FS1]
